# Supplementary material for: Targeting intracranial patient-derived glioblastoma (GBM) with a NIR-I fluorescent immunoconjugate for facilitating its image-guided resection
Source: Royal Society of Chemistry journal article supplement (doi:10.1039/d0ra07245a), 2020-01-01
Supplement: d0ra07245a1.pdf [file d0ra07245a1.pdf]

## SUPPLEMENTARY INFORMATION

### Targeting Intracranial Patient-Derived Glioblastoma (GBM) with a NIR-I Fluorescent Immunoconjugate for Facilitating Its Image-Guided Resection

Kenneth S. Hettie<sup>1,2,\*</sup>, Nutte Tarn Teraphongphom<sup>2</sup>, Robert D. Ertsey<sup>2</sup>, Frederick T. Chin<sup>1,\*</sup>

<sup>1</sup>Department of Radiology, Stanford University School of Medicine, Stanford, CA, 94305, USA

<sup>2</sup>Department of Otolaryngology - Head & Neck Surgery, Stanford University, Stanford, CA 94305, USA

\*Co-corresponding author:

Kenneth S. Hettie, PhD  
1201 Welch Rd  
Stanford, CA 94305  
Telephone: 650-725-8172  
Email: [khettie@stanford.edu](mailto:khettie@stanford.edu)

Frederick T. Chin, PhD  
3165 Porter Dr.  
Palo Alto, CA 94304  
Telephone: 650-725-4182  
Email: [chinf@stanford.edu](mailto:chinf@stanford.edu)

#### TABLE OF CONTENTS

#### PAGE

---

|                                                                                             |           |
|---------------------------------------------------------------------------------------------|-----------|
| <b>1. Molecular Structure, Physical, and Photophysical Profile of IRDye® 800CW NHS.....</b> | <b>S2</b> |
|---------------------------------------------------------------------------------------------|-----------|

## 1. Molecular Structure of IRDye® 800CW NHS Ester

**Table S1.** Molecular structure, physical, and photophysical properties of IRDye® 800CW

|                                          | <b>IRDye® 800CW</b><br>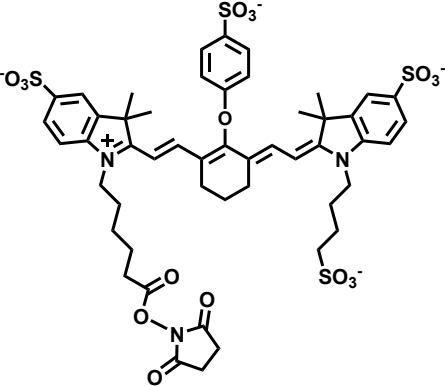 |
|------------------------------------------|----------------------------------------------------------------------------------------------------------|
| M.W. (g/mol)                             | 1097.23 (as drawn)<br>1189.18 (tetrasodium salt)                                                         |
| $\lambda_{\text{abs}}$ (nm)<br>in 1X PBS | 774                                                                                                      |
| $\lambda_{\text{em}}$ (nm)<br>in 1X PBS  | 789 (in free form)<br>795 (when conjugated to antibody)                                                  |
| Stokes shift (nm)                        | 15                                                                                                       |
| Quantum Yield ( $\Phi$ )<br>in 1X PBS    | 0.034                                                                                                    |
| Net Charge<br>at pH 7.4                  | -3                                                                                                       |
